# Supplementary material for: Electric field assisted growth and field emission properties of thermally oxidized CuO nanowires
Source: Royal Society of Chemistry journal article supplement (doi:10.1039/c6ra27426a), 2017-01-01
Supplement: c6ra27426a1.pdf [file c6ra27426a1.pdf]

## Supporting information

### Electric field assisted growth and field emission properties of thermally oxidized CuO nanowires

Chunmei Tang<sup>1</sup>, Xinyue Liao<sup>2</sup>, Weijie Zhong<sup>1</sup>, Hongya Yu<sup>1</sup>, Zhongwu Liu<sup>1</sup>,

<sup>1</sup>School of Materials Science and Engineering, South China University of Technology, Guangzhou, 510640, China

<sup>2</sup>Zhixin High School, No.152, Zhixin South Road, Guangzhou, 510080, China

E-mail: [zwliu@scut.edu.cn](mailto:zwliu@scut.edu.cn)

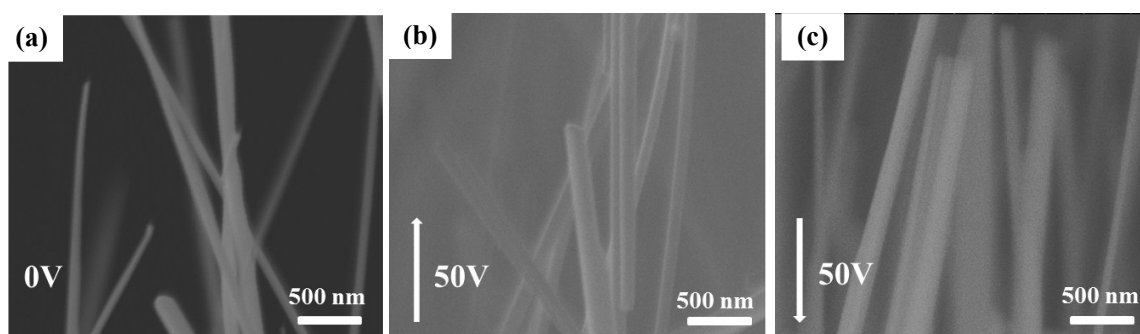

Fig. S1 Cross-sectional SEM images of the tips of (a) 0V, (b) 50V upward, and (c) 50V downward.

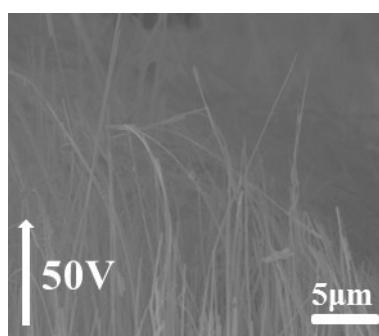

Fig. S2 Cross-sectional SEM images of the upper part of 50V upward after field emission test.
